# Supplementary material for: Stability and mobility of supported Nin (n = 1–10) clusters on ZrO2(111) and YSZ(111) surfaces: a density functional theory study
Source: Royal Society of Chemistry journal article supplement (doi:10.1039/c7fd00217c), 2018-01-01
Supplement: c7fd00217c1.pdf [file c7fd00217c1.pdf]

# Stability and Mobility of Supported Ni<sub>n</sub> (n = 1-10) Clusters on ZrO<sub>2</sub>(111) and YSZ(111) Surfaces: a Density Functional Theory Study

Abdelaziz Cadi-Essadek, Alberto Roldan and Nora H. de Leeuw\*

School of Chemistry, Cardiff University, Main Building, Park Place, CF10 3AT, Cardiff,  
United Kingdom

\*Tel: +44 (0)2920870658

\*e-mail: DeLeeuwN@cardiff.ac.uk

This document contains the less stable configurations and their respective binding energies of Ni clusters on ZrO<sub>2</sub>(111) (**Figure S1** to **Figure S5**) and YSZ(111) (**Figure S6** to **Figure S21**) surfaces.

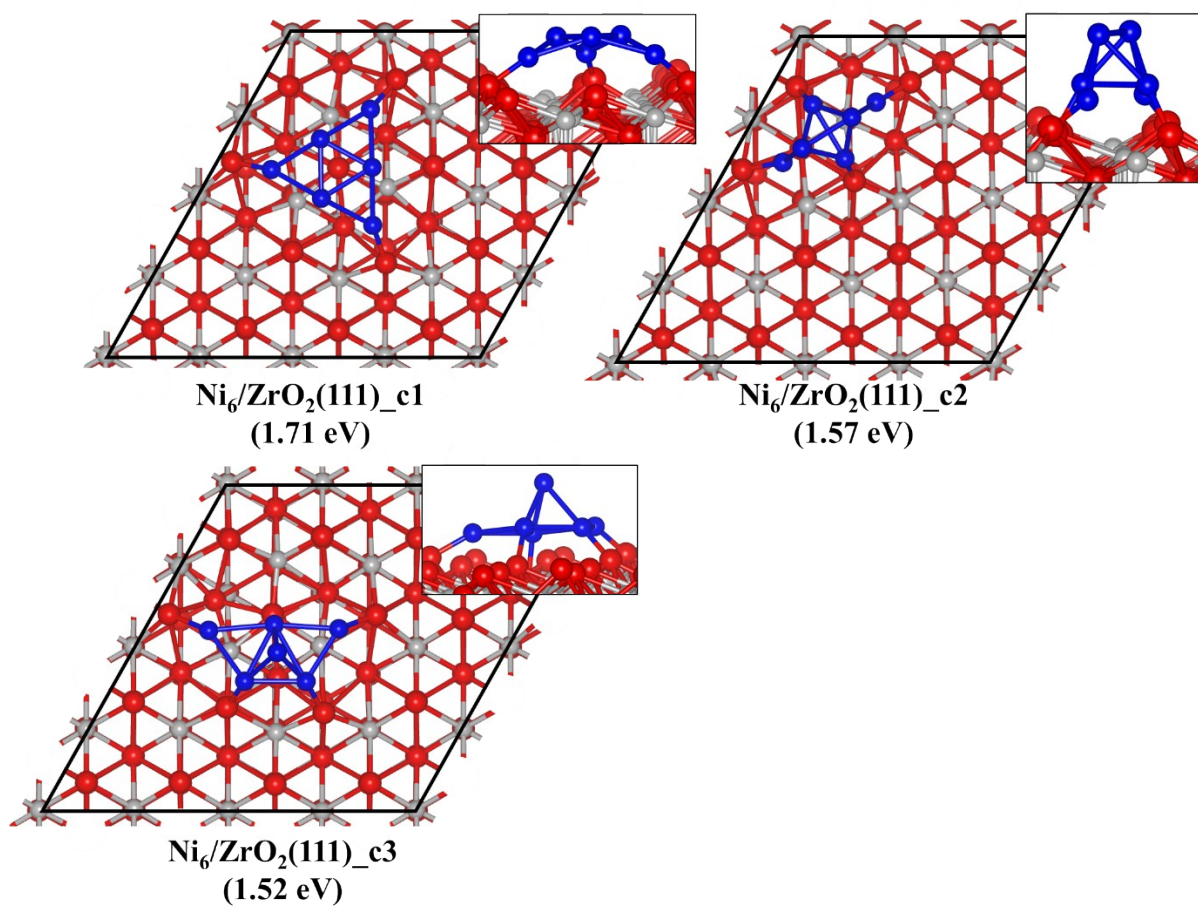

**Figure S1.** Top views (with side views as inset) of the less stable configurations of the  $\text{Ni}_6/\text{ZrO}_2(111)$  system. The binding energies are in parenthesis. Colour key: red, grey, and blue spheres correspond to oxygen, Zr and Ni atoms, respectively.

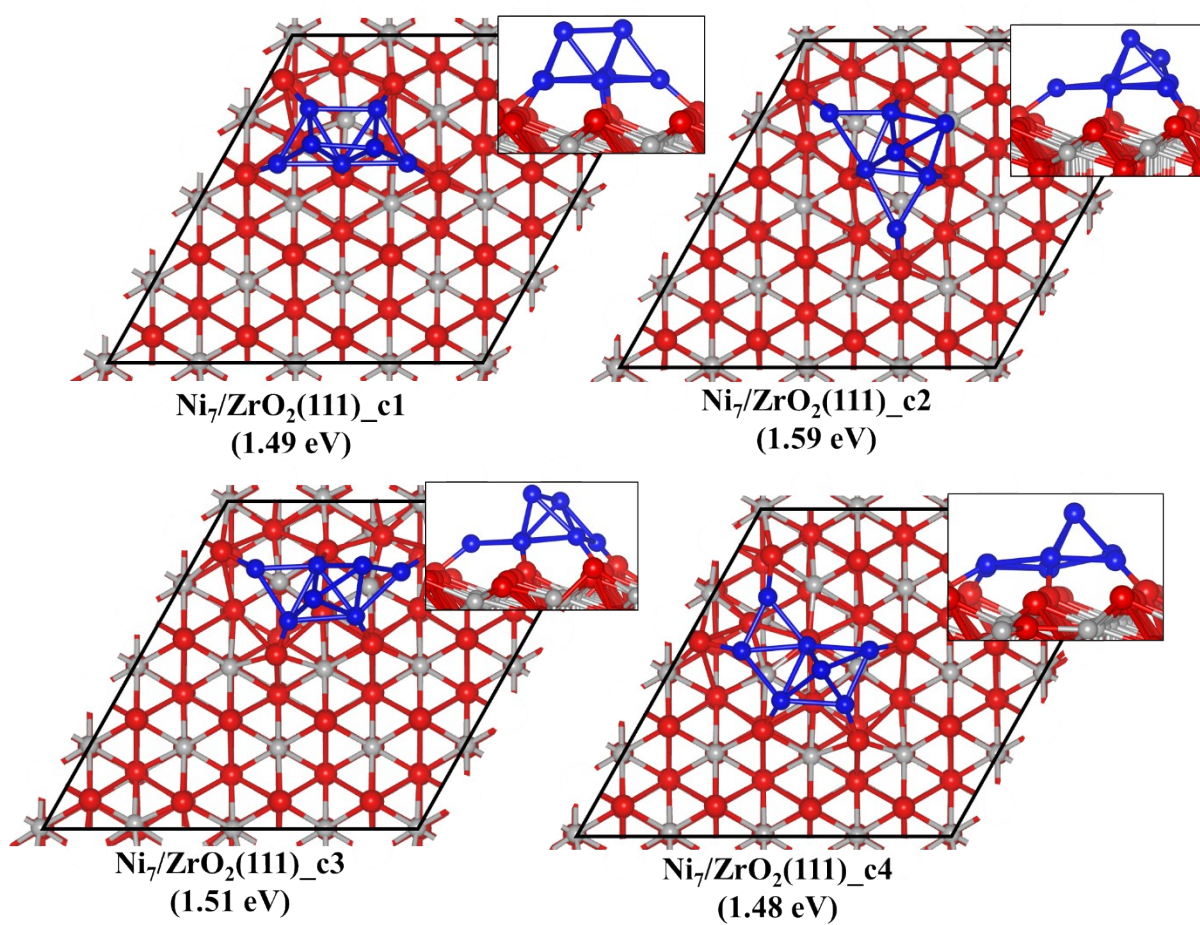

**Figure S2.** Top views (with side views as inset) of the less stable configurations of the  $\text{Ni}_7/\text{ZrO}_2(111)$  system. The binding energies are in parenthesis. Colour key: red, grey, and blue spheres correspond to oxygen, Zr and Ni atoms, respectively.

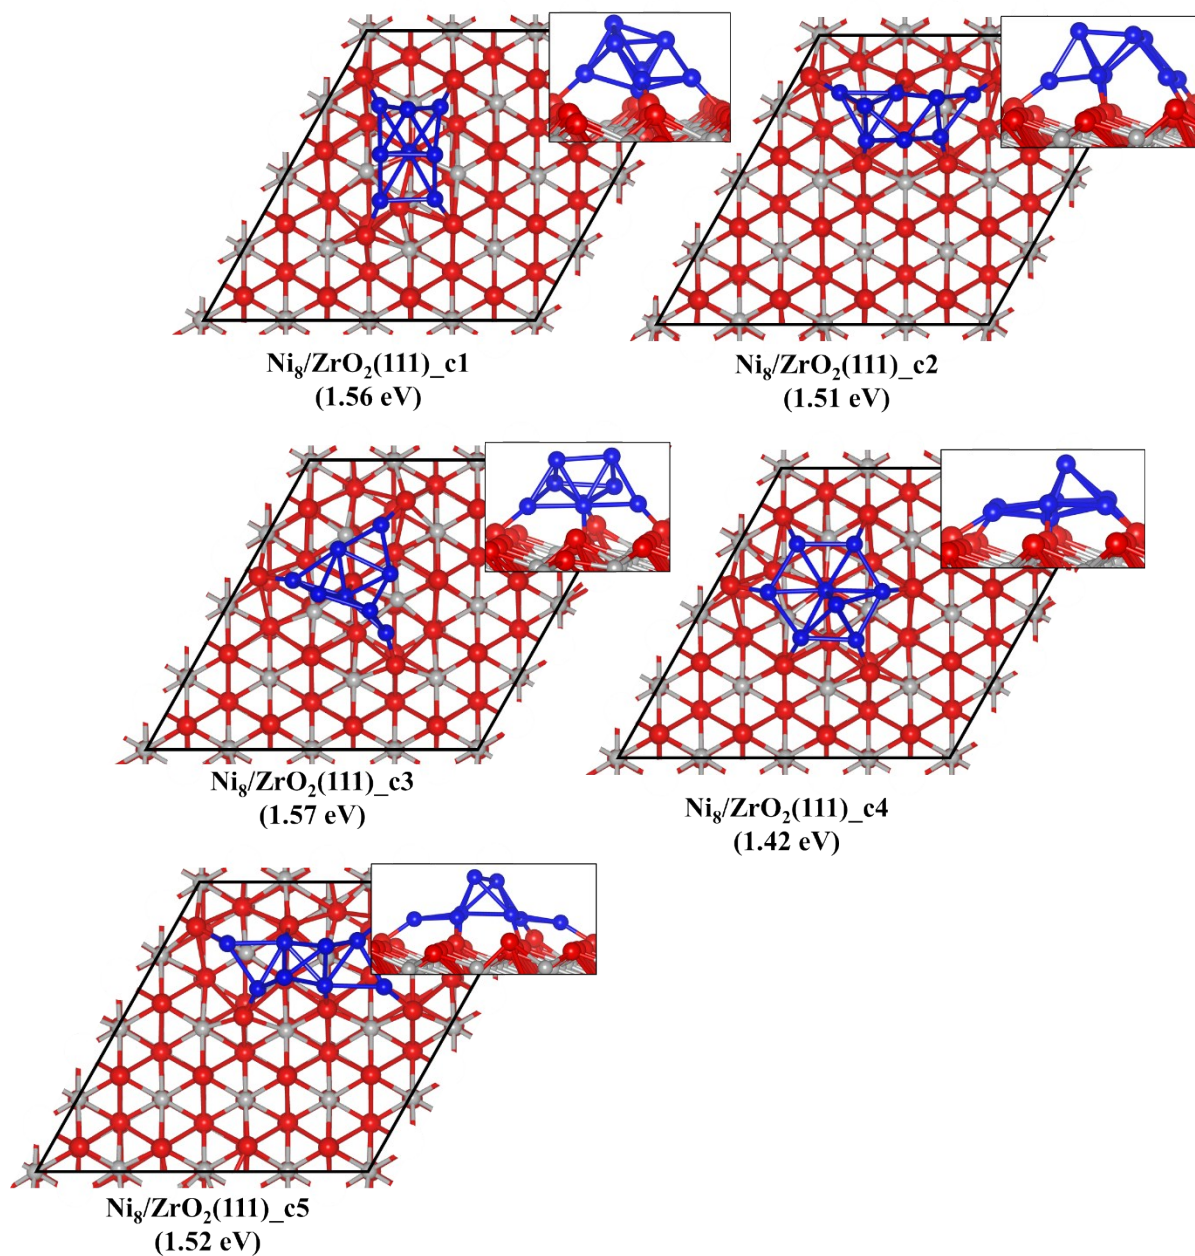

**Figure S3.** Top views (with side views as inset) of the less stable configurations of the  $\text{Ni}_8/\text{ZrO}_2(111)$  system. The binding energies are in parenthesis. Colour key: red, grey, and blue spheres correspond to oxygen, Zr and Ni atoms, respectively.

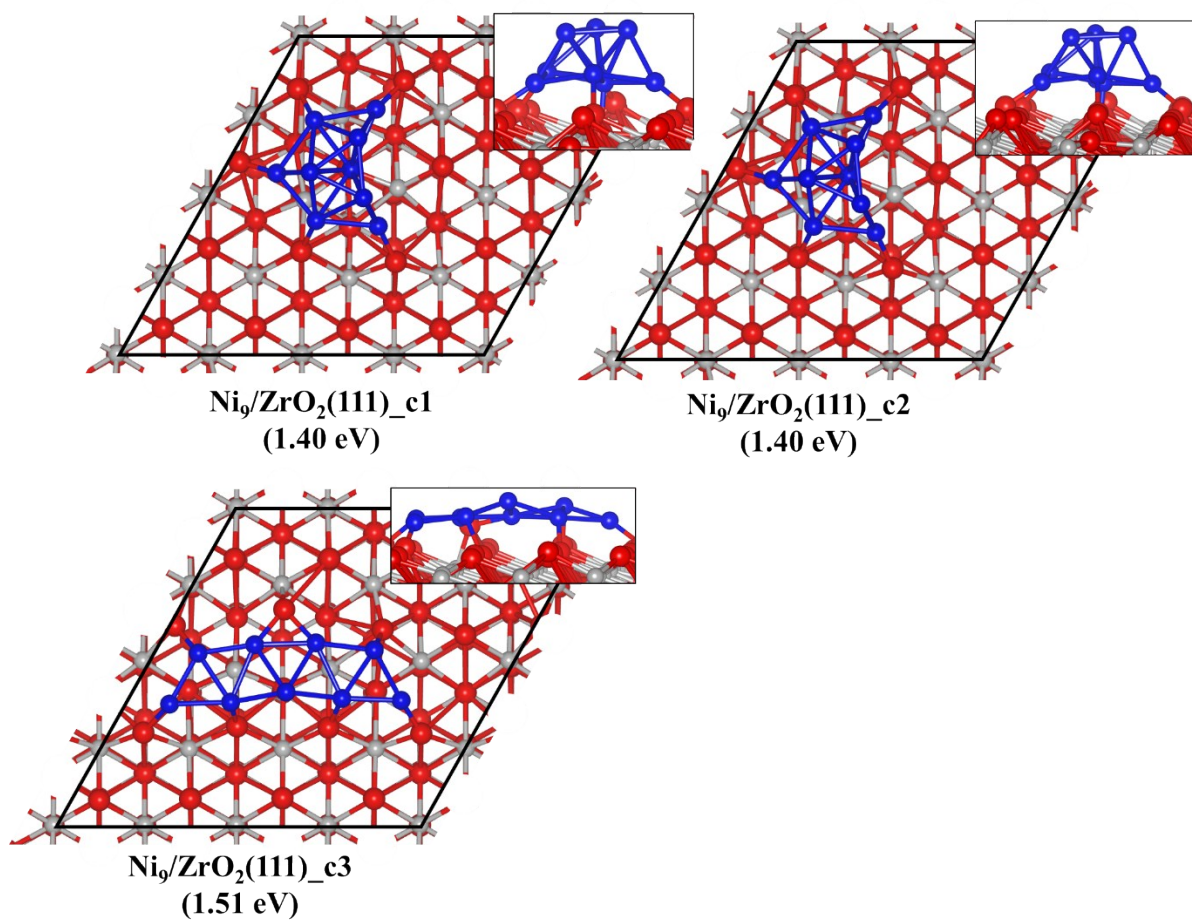

**Figure S4.** Top views (with side views as inset) of the less stable configurations of the  $\text{Ni}_9/\text{ZrO}_2(111)$  system. The binding energies are in parenthesis. Colour key: red, grey, and blue spheres correspond to oxygen, Zr and Ni atoms, respectively.

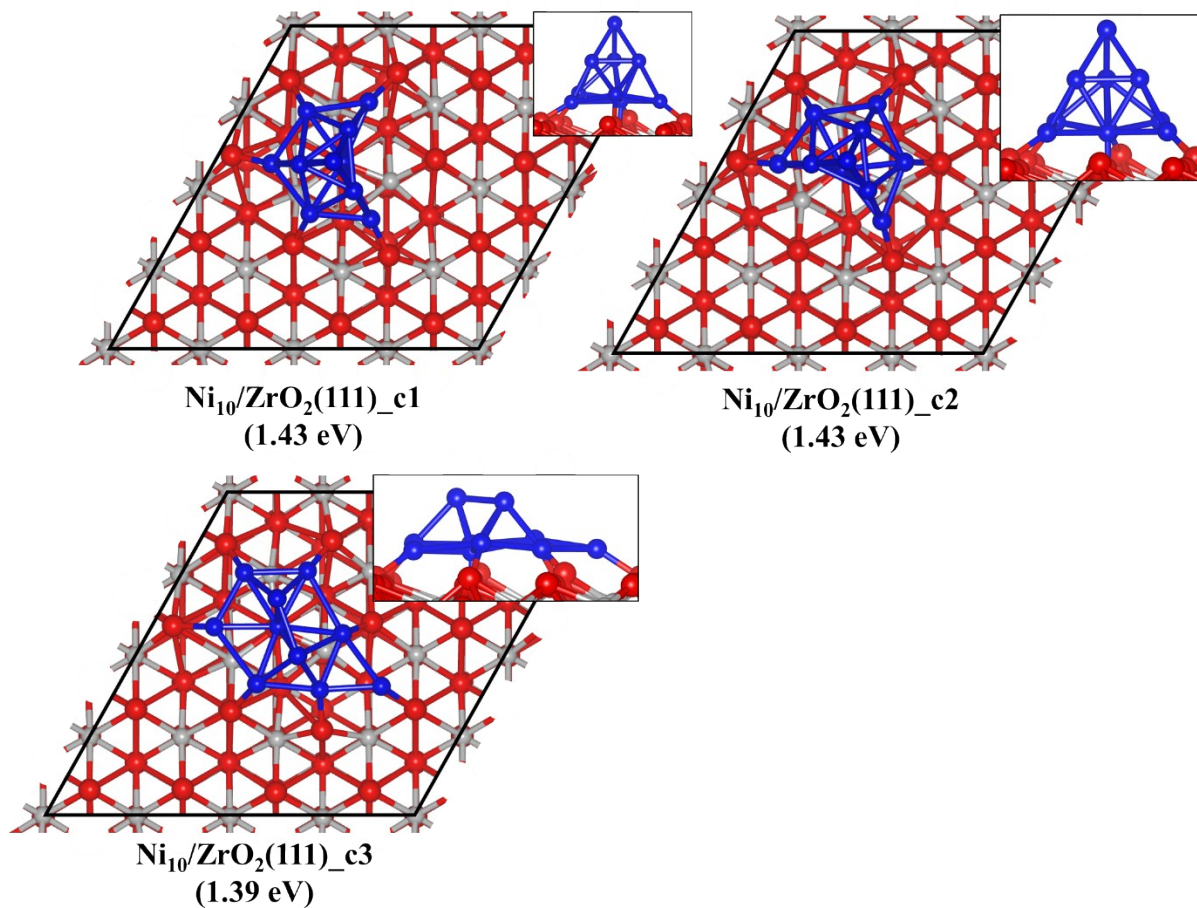

**Figure S5.** Top views (with side views as inset) of the less stable configurations of the  $\text{Ni}_{10}/\text{ZrO}_2(111)$  system. The binding energies are in parenthesis. Colour key: red, grey, and blue spheres correspond to oxygen, Zr and Ni atoms, respectively.

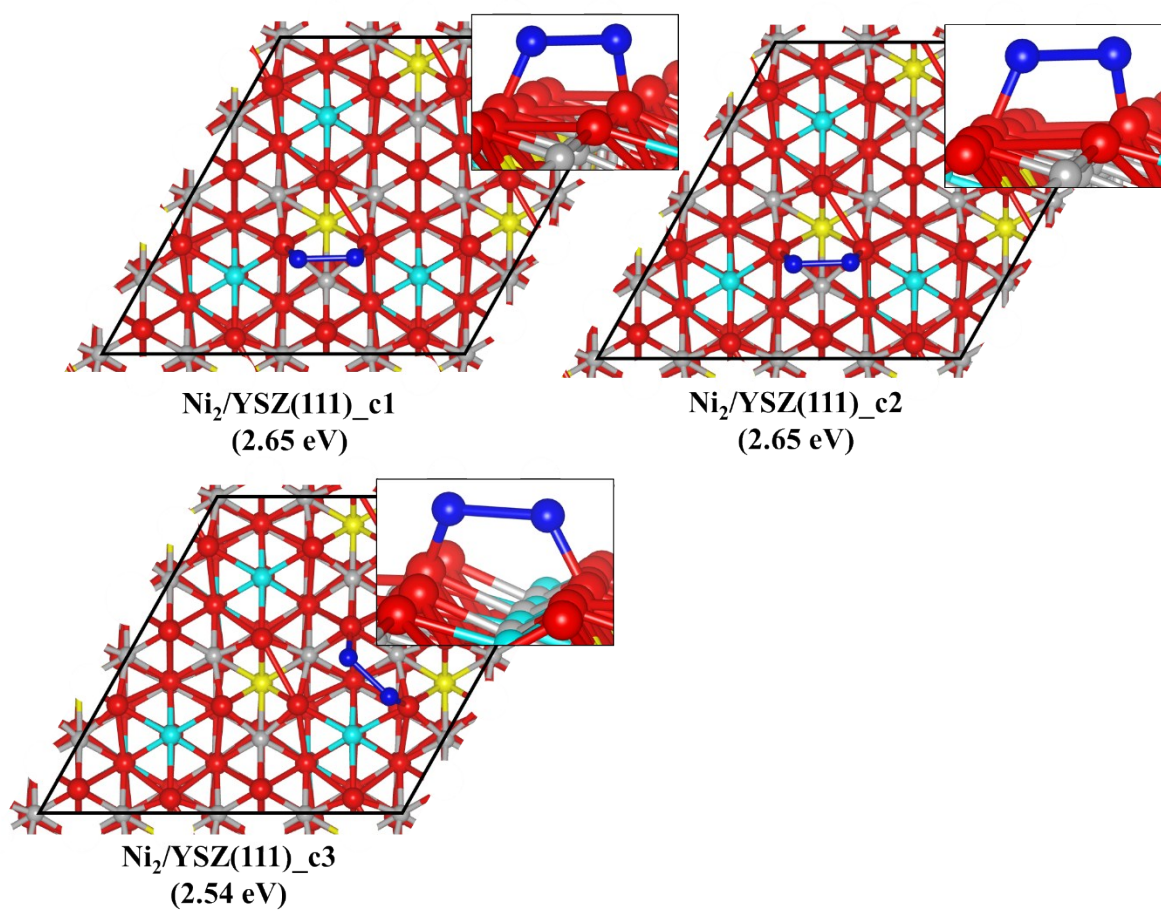

**Figure S6.** Top views (with side views as inset) of the less stable configurations of  $\text{Ni}_2/\text{YSZ}(111)$  systems. The binding energies are in parenthesis. Colour key: red, grey, blue and cyan spheres correspond to oxygen, Zr, Ni and Y atoms, respectively. The oxygen vacancy is represented by a yellow sphere.

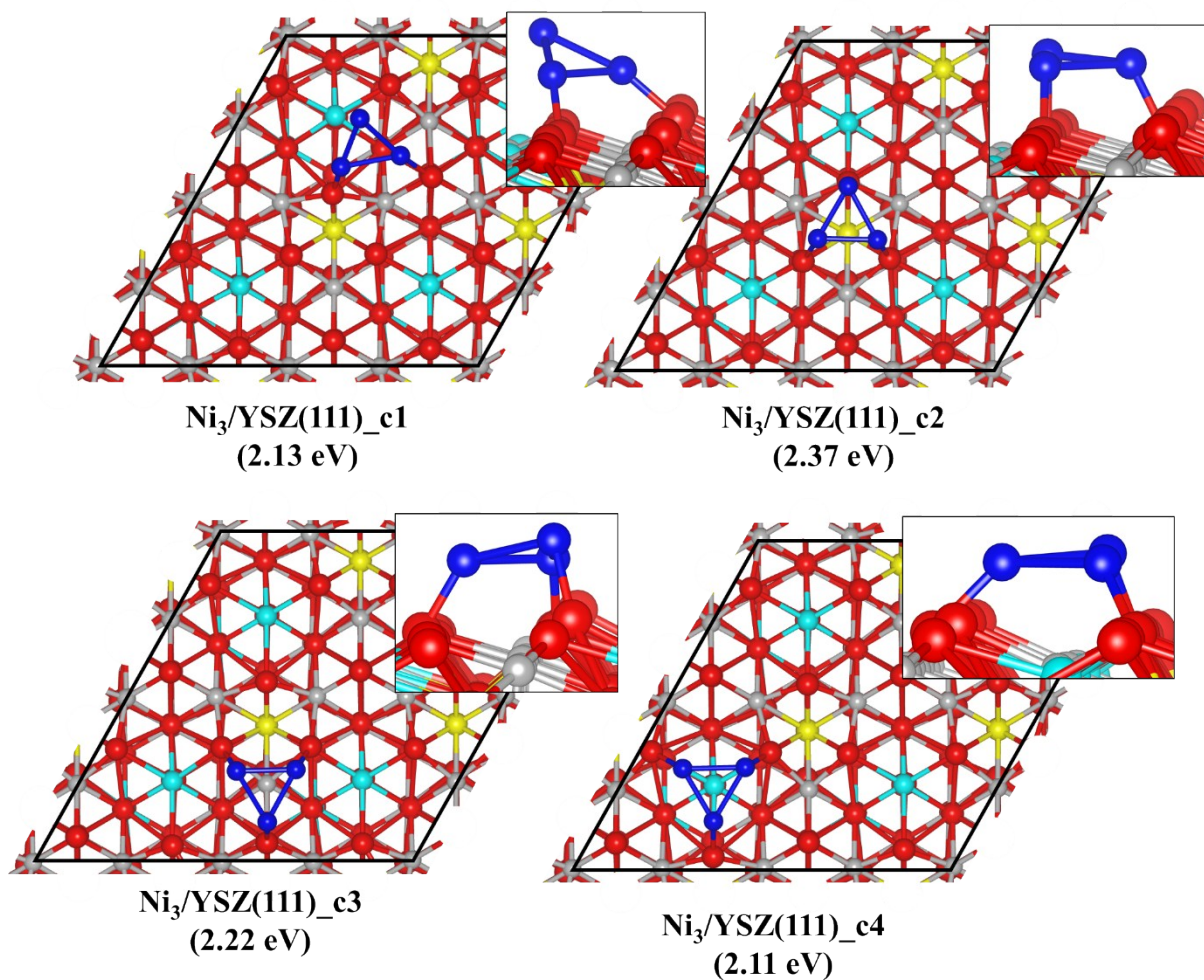

**Figure S7.** Top views (with side views as inset) of the less stable configurations of  $\text{Ni}_3/\text{YSZ}(111)$  systems. The binding energies are in parenthesis. Colour key: red, grey, blue and cyan spheres correspond to oxygen, Zr, Ni and Y atoms, respectively. The oxygen vacancy is represented by a yellow sphere.



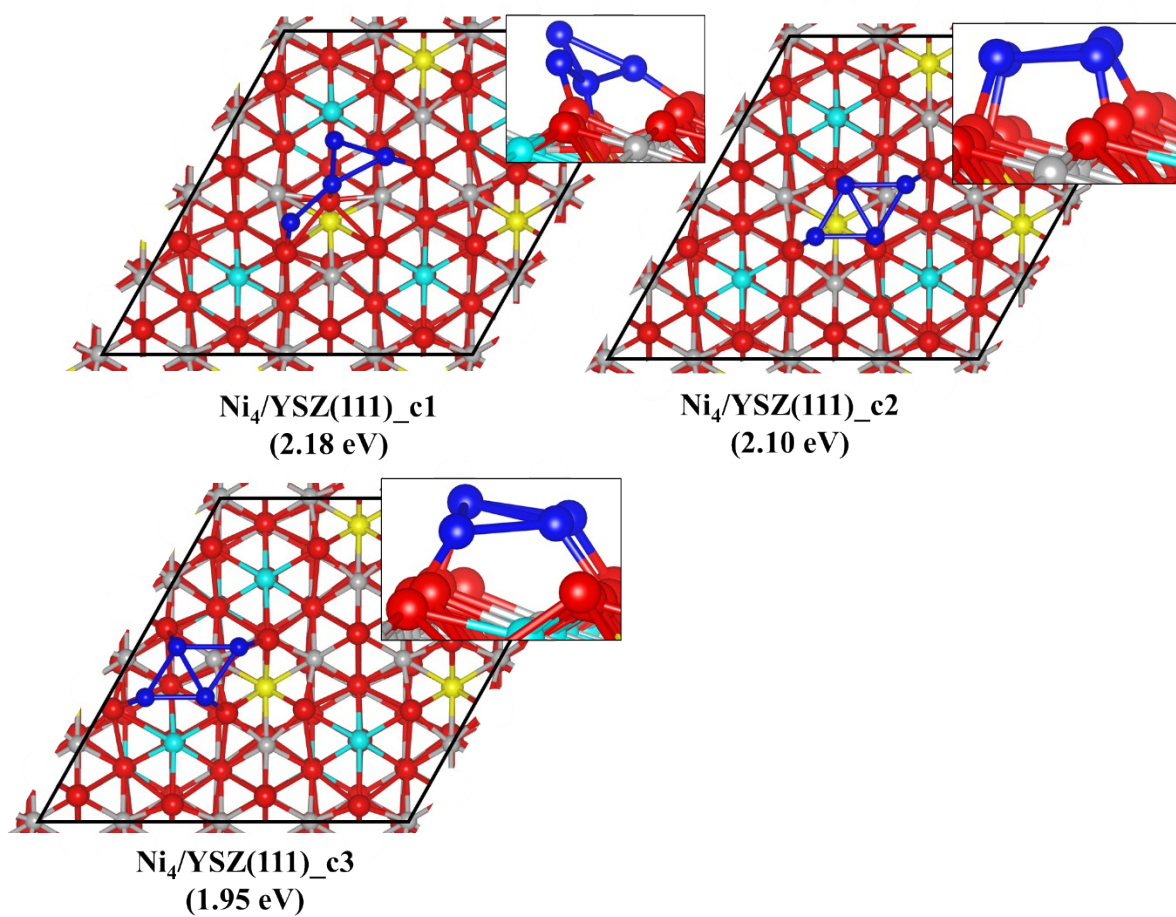

**Figure S8.** Top views (with side views as inset) of the less stable configurations of  $\text{Ni}_4/\text{YSZ}(111)$  systems (flat configurations). The binding energies are in parenthesis. Colour key: red, grey, blue and cyan spheres correspond to oxygen, Zr, Ni and Y atoms, respectively. The oxygen vacancy is represented by a yellow sphere.

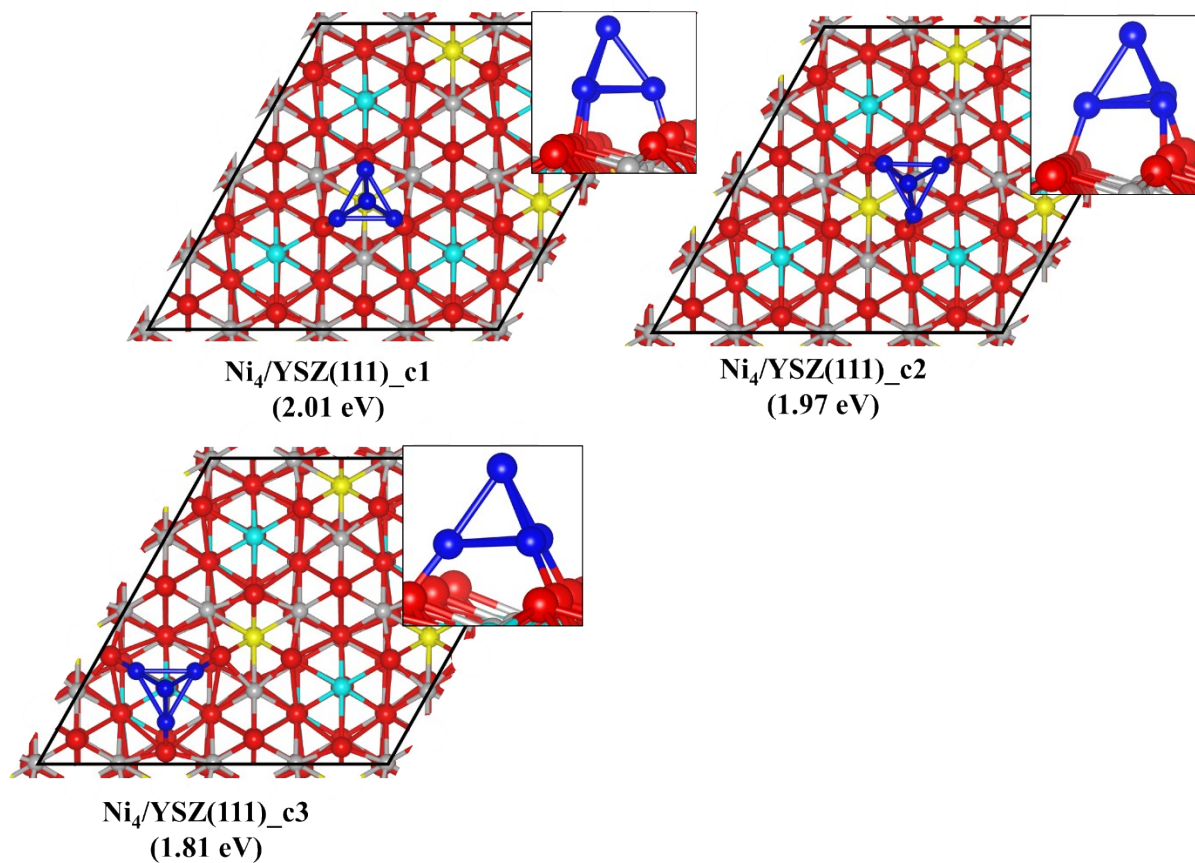

**Figure S9.** Top views (with side views as inset) of the less stable configurations of  $\text{Ni}_4/\text{YSZ}(111)$  systems (pyramid configurations). The binding energies are in parenthesis. Colour key: red, grey, blue and cyan spheres correspond to oxygen, Zr, Ni and Y atoms, respectively. The oxygen vacancy is represented by a yellow sphere.

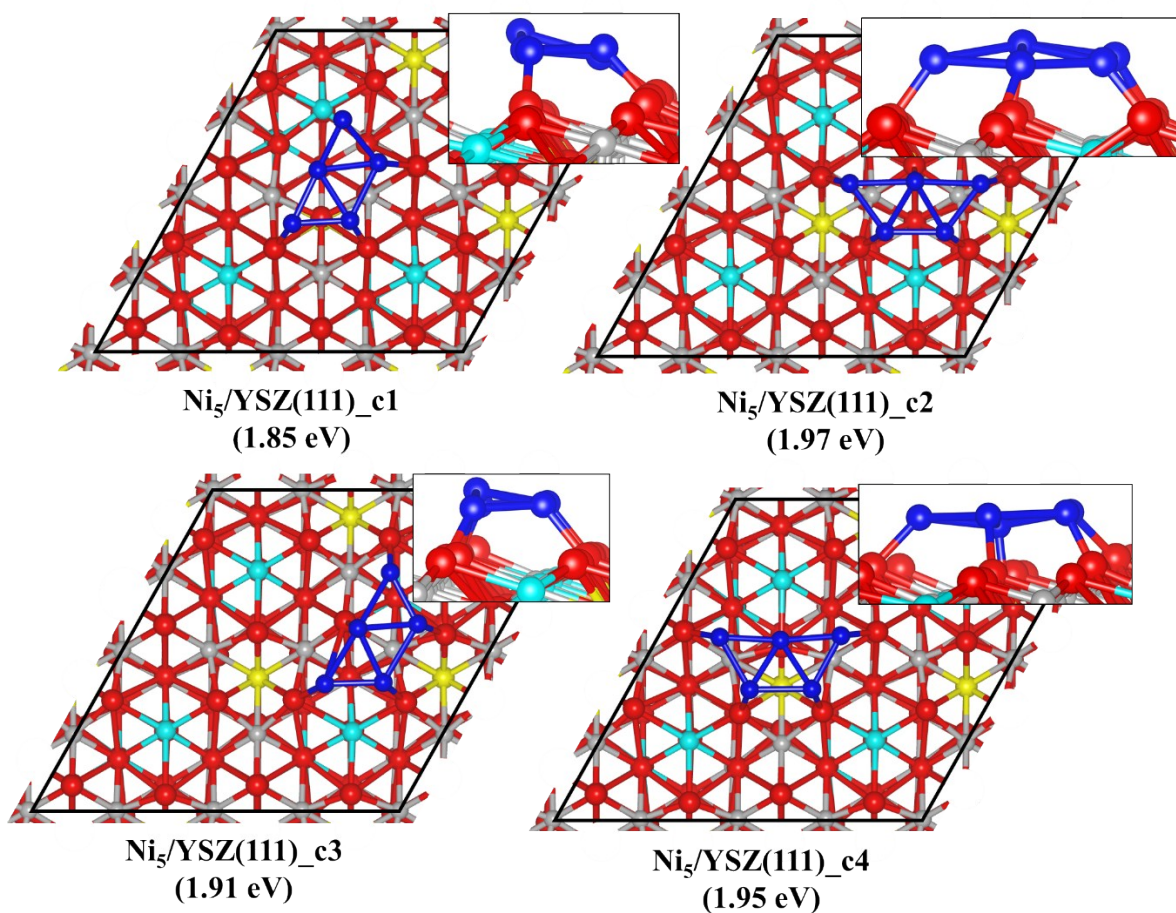

**Figure S10.** Top views (with side views as inset) of the less stable configurations of  $\text{Ni}_5/\text{YSZ}(111)$  systems (flat configurations). The binding energies are in parenthesis. Colour key: red, grey, blue and cyan spheres correspond to oxygen, Zr, Ni and Y atoms, respectively. The oxygen vacancy is represented by a yellow sphere.

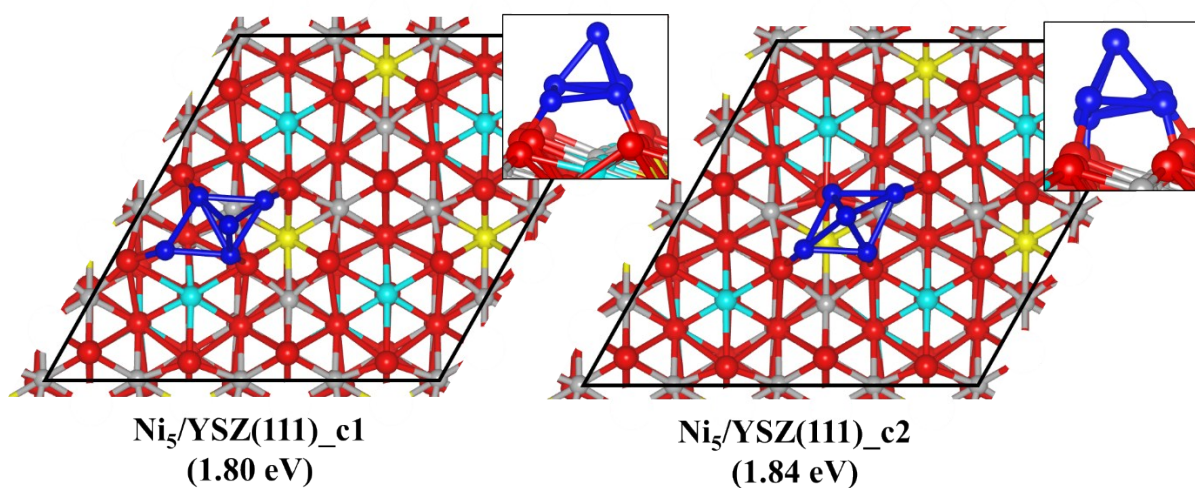

**Figure S11.** Top views (with side views as inset) of the non stable configurations of  $\text{Ni}_5/\text{YSZ}(111)$  systems (pyramid configurations). The binding energies are in parenthesis. Colour key: red, grey, blue and cyan spheres correspond to oxygen, Zr, Ni and Y atoms, respectively. The oxygen vacancy is represented by a yellow sphere.

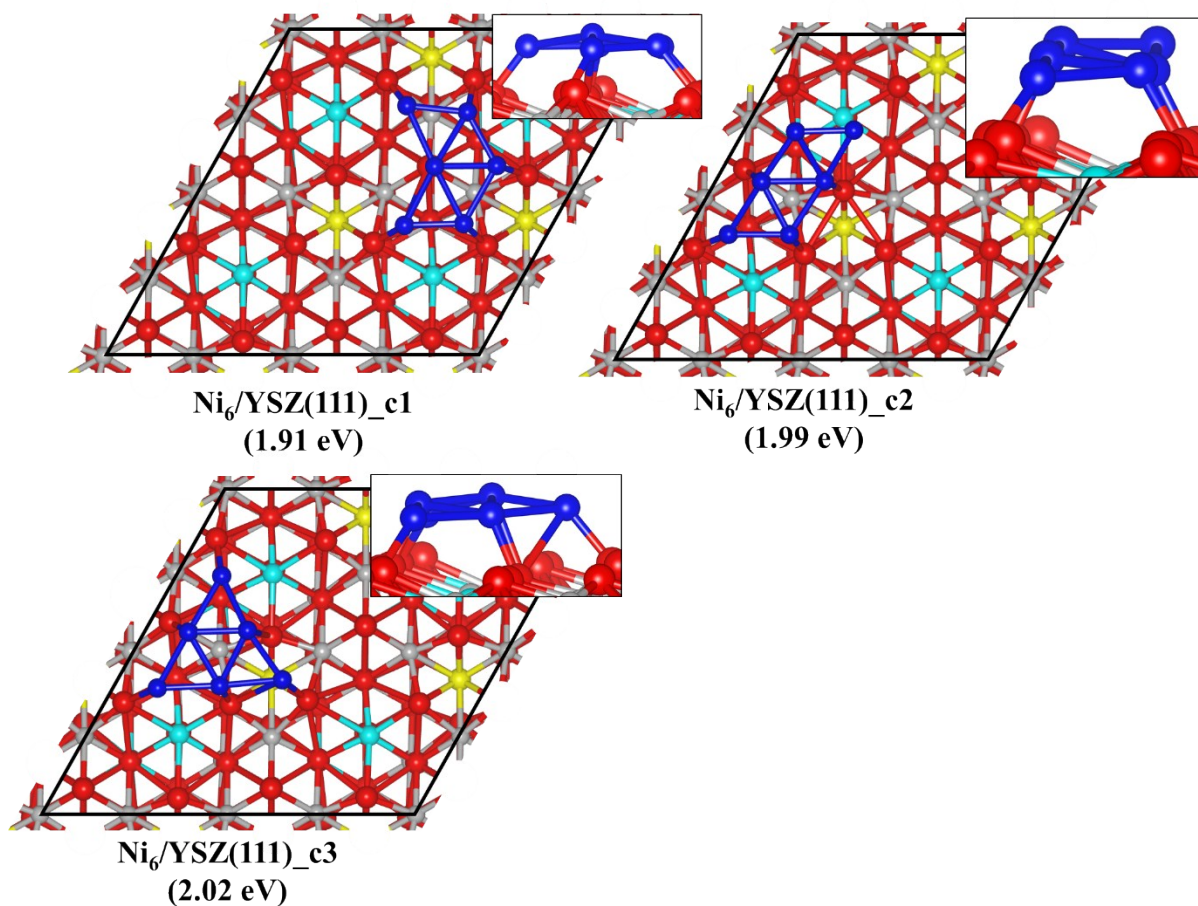

**Figure S12.** Top views (with side views as inset) of the less stable configurations of  $\text{Ni}_6/\text{YSZ}(111)$  systems (flat configurations). The binding energies are in parenthesis. Colour key: red, grey, blue and cyan spheres correspond to oxygen, Zr, Ni and Y atoms, respectively. The oxygen vacancy is represented by a yellow sphere.

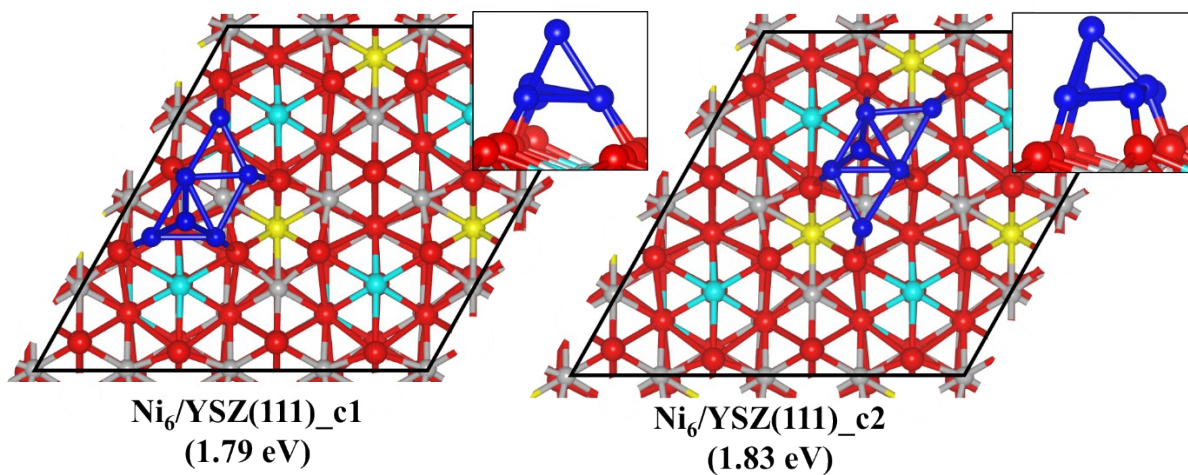

**Figure S13.** Top views (with side views as inset) of the less stable configurations of  $\text{Ni}_6/\text{YSZ}(111)$  systems (pyramid configurations). The binding energies are in parenthesis. Colour key: red, grey, blue and cyan spheres correspond to oxygen, Zr, Ni and Y atoms, respectively. The oxygen vacancy is represented by a yellow sphere.

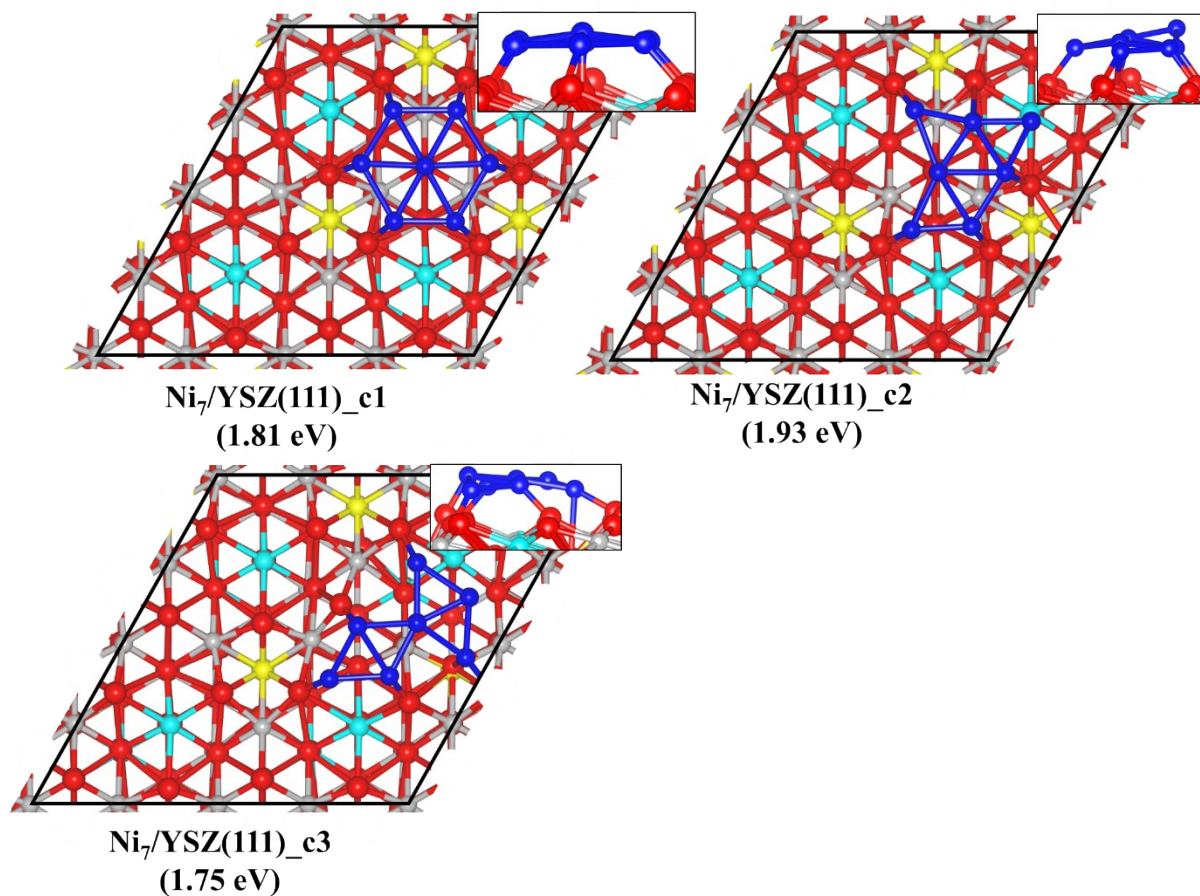

**Figure S14.** Top views (with side views as inset) of the less stable configurations of Ni<sub>7</sub>/YSZ(111) systems (flat configurations). The binding energies are in parenthesis. Colour key: red, grey, blue and cyan spheres correspond to oxygen, Zr, Ni and Y atoms, respectively. The oxygen vacancy is represented by a yellow sphere.

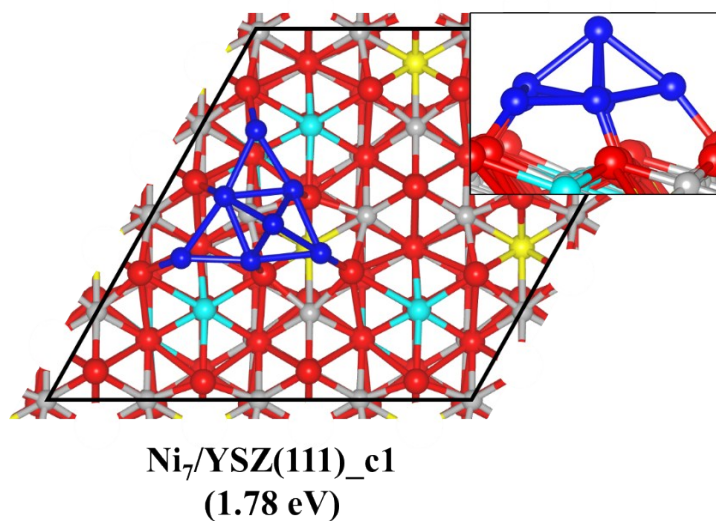

**Figure S15.** Top views (with side views as inset) of the less stable configuration of Ni<sub>7</sub>/YSZ(111) system (pyramid configuration). The binding energies are in parenthesis. Colour key: red, grey, blue and cyan spheres correspond to oxygen, Zr, Ni and Y atoms, respectively. The oxygen vacancy is represented by a yellow sphere.

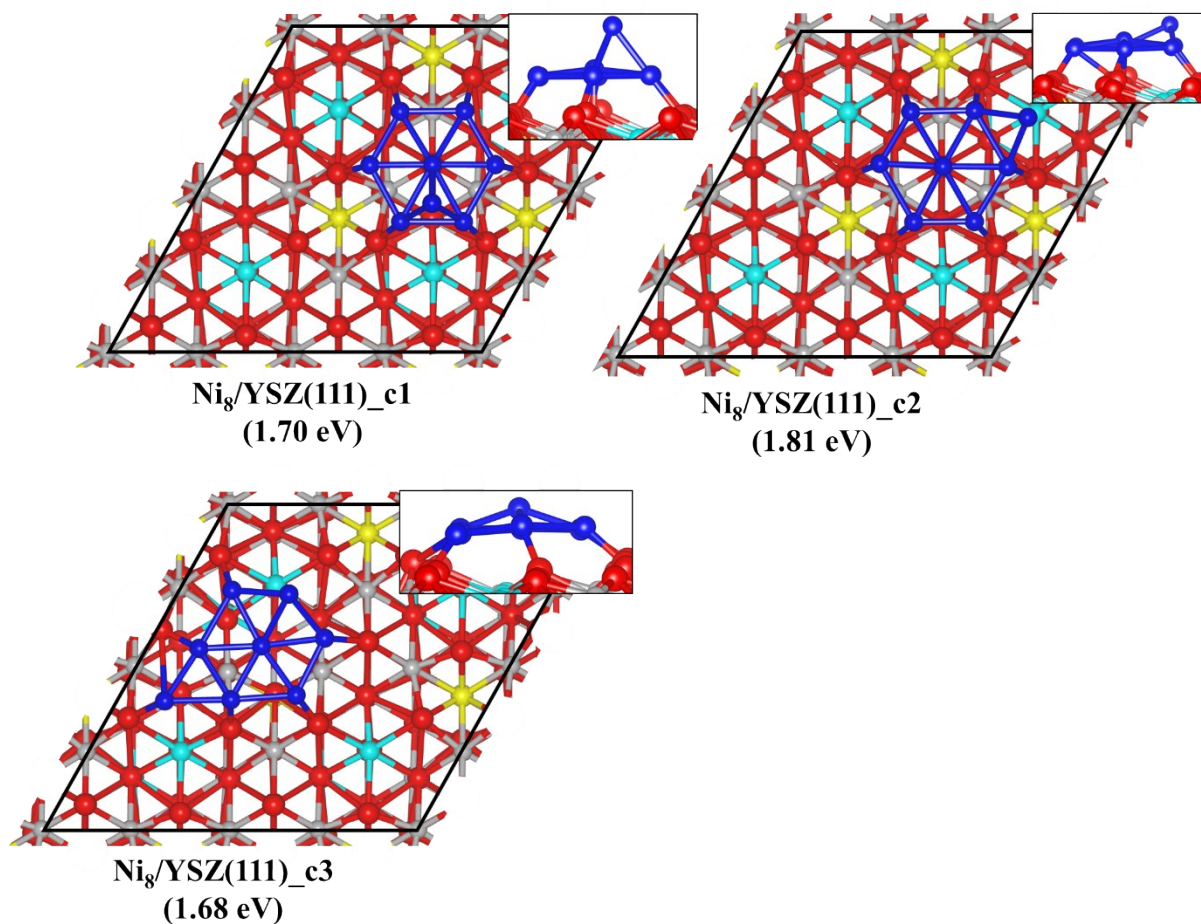

**Figure S16.** Top views (with side views as inset) of the less stable configurations of  $\text{Ni}_8/\text{YSZ}(111)$  systems (flat configurations). The binding energies are in parenthesis. Colour key: red, grey, blue and cyan spheres correspond to oxygen, Zr, Ni and Y atoms, respectively. The oxygen vacancy is represented by a yellow sphere.

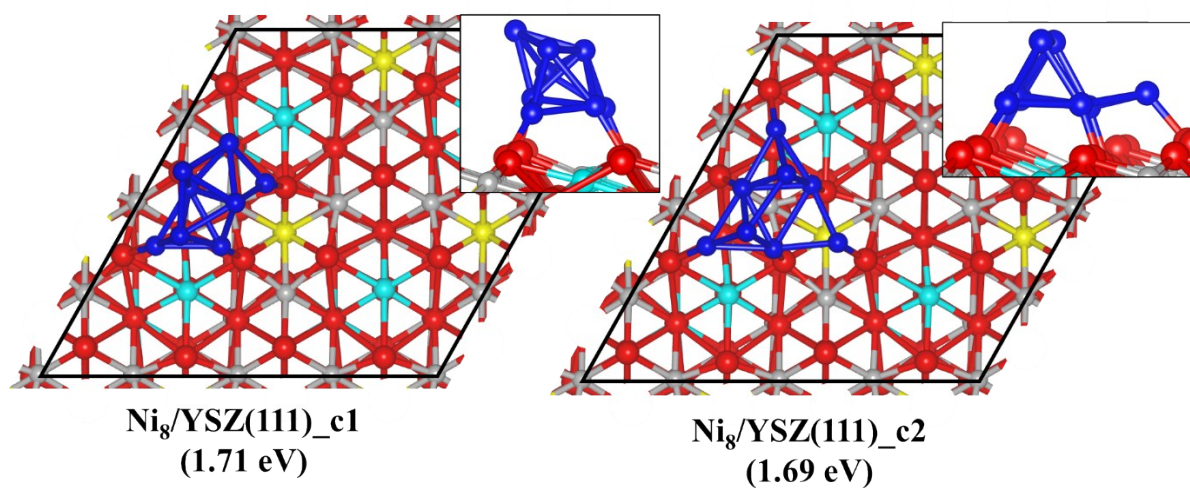

**Figure S17.** Top views (with side views as inset) of the less stable configurations of  $\text{Ni}_8/\text{YSZ}(111)$  systems (pyramid configurations). The binding energies are in parenthesis. Colour key: red, grey, blue and cyan spheres correspond to oxygen, Zr, Ni and Y atoms, respectively. The oxygen vacancy is represented by a yellow sphere.

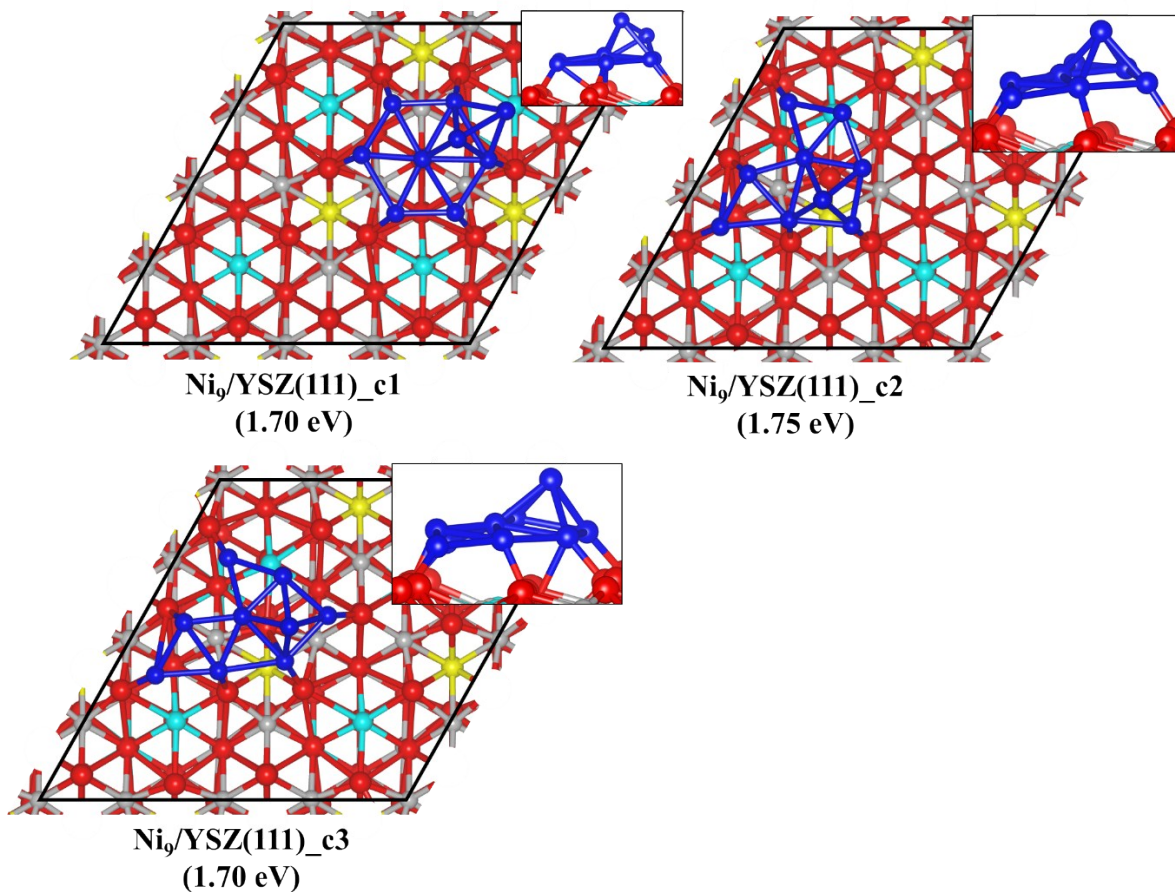

**Figure S18.** Top views (with side views as inset) of the less stable configurations of Ni<sub>9</sub>/YSZ(111) systems (flat configurations). The binding energies are in parenthesis. Colour key: red, grey, blue and cyan spheres correspond to oxygen, Zr, Ni and Y atoms, respectively. The oxygen vacancy is represented by a yellow sphere.

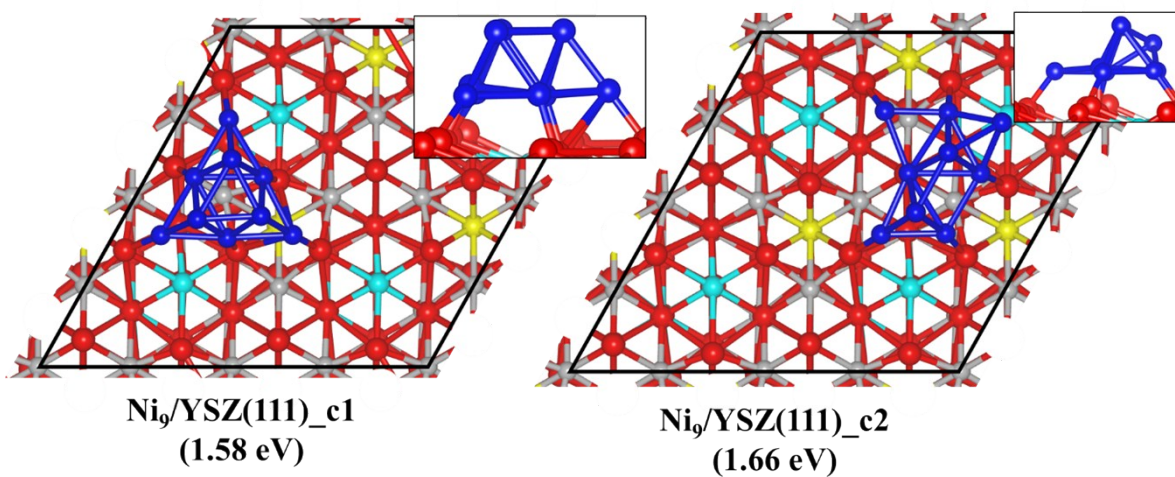

**Figure S19.** Top views (with side views as inset) of the less stable configurations of Ni<sub>9</sub>/YSZ(111) systems (flat configurations). The binding energies are in parenthesis. Colour key: red, grey, blue and cyan spheres correspond to oxygen, Zr, Ni and Y atoms, respectively. The oxygen vacancy is represented by a yellow sphere.

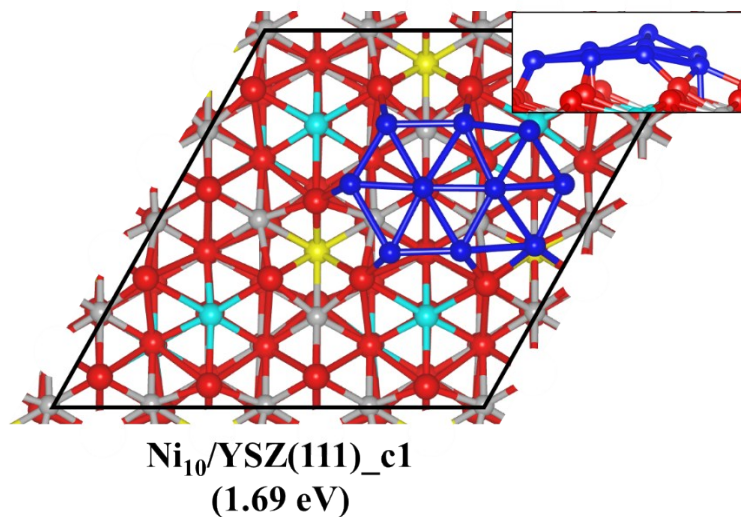

**Figure S20.** Top views (with side views as inset) of the less stable configuration of Ni<sub>10</sub>/YSZ(111) system (flat configurations). The binding energies are in parenthesis. Colour key: red, grey, blue and cyan spheres correspond to oxygen, Zr, Ni and Y atoms, respectively. The oxygen vacancy is represented by a yellow sphere.

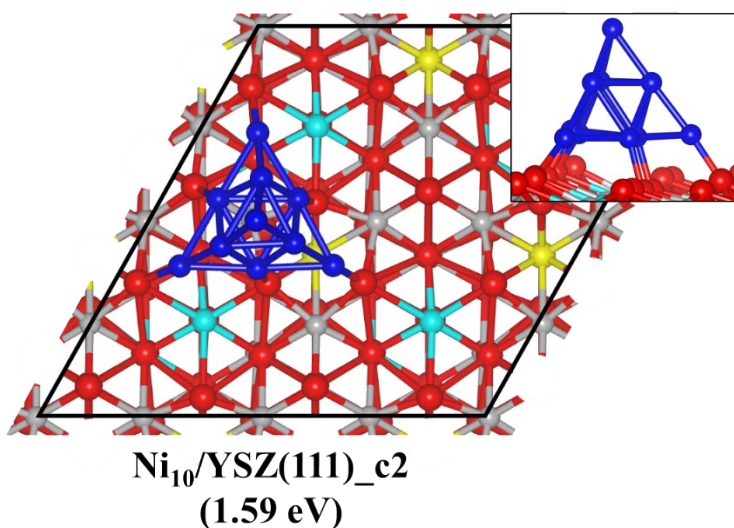

**Figure S21.** Top views (with side views as inset) of the less stable configuration of Ni<sub>10</sub>/YSZ(111) system (pyramid configurations). The binding energies are in parenthesis. Colour key: red, grey, blue and cyan spheres correspond to oxygen, Zr, Ni and Y atoms, respectively. The oxygen vacancy is represented by a yellow sphere.
